# Supplementary material
Source: ML conference proceedings conference paper supplement (https://proceedings.mlr.press/v139/chen21j.html)
Supplement: Supplementary file 2 [file chen21j-supp.zip]

Archive with 3 entries (2 files):
- supplementary_material/
- supplementary_material/code_icml2021.zip
- supplementary_material/appendix.pdf
